# Supplementary material for: Efficacy and prognostic factors of stereotactic body radiotherapy combined with immunotherapy for pulmonary oligometastases: a preliminary retrospective cohort study
Source: PubMed Central journal article supplement — Transl Lung Cancer Res. 2024 Aug 28;13(8):1950–63. doi: 10.21037/tlcr-24-588 (PMC11384503; doi:10.21037/tlcr-24-588), 2024-08-28
Supplement: tlcr-13-08-1950-dss.pdf [file tlcr-13-08-1950-dss.pdf]

## Data Sharing Statement

|                     |                                                                                                                                                     |                                                                                                                                                                         |
|---------------------|-----------------------------------------------------------------------------------------------------------------------------------------------------|-------------------------------------------------------------------------------------------------------------------------------------------------------------------------|
| <b>Article Info</b> | <a href="https://dx.doi.org/10.21037/tlcr-24-588">https://dx.doi.org/10.21037/tlcr-24-588</a>                                                       |                                                                                                                                                                         |
| <b>Item</b>         | <b>Question</b>                                                                                                                                     | <b>Authors' Response<br/>(place "-" if not applicable)</b>                                                                                                              |
| 1                   | Would you like to share data collected for your study to others?                                                                                    | No.                                                                                                                                                                     |
| 2                   | If not, would you like to share the reason for your decision?                                                                                       | We will further analyze the raw data in the next step of the study. Therefore, the data cannot be made public to avoid affecting the publication of subsequent studies. |
| 3                   | What data in particular will be shared?                                                                                                             | -                                                                                                                                                                       |
| 4                   | Any other documents will be shared? Such as study protocol, statistical analysis plan, informed consent form, clinical study report, analytic code. | No.                                                                                                                                                                     |
| 5                   | When will data availability begin?                                                                                                                  | --                                                                                                                                                                      |
| 6                   | When will data availability end?                                                                                                                    | -                                                                                                                                                                       |
| 7                   | To whom will you share the data?                                                                                                                    | -                                                                                                                                                                       |
| 8                   | For what type of analysis or purpose?                                                                                                               | -                                                                                                                                                                       |
| 9                   | How or where can the data/documents be obtained?                                                                                                    | -                                                                                                                                                                       |
| 10                  | Any other restrictions?                                                                                                                             | -                                                                                                                                                                       |
